# Supplementary material for: Progenitor Cell Dynamics in the Newt Telencephalon during Homeostasis and Neuronal Regeneration
Source: PubMed Central journal article supplement — Stem Cell Reports. 2014 Mar 20;2(4):507–19. doi: 10.1016/j.stemcr.2014.01.018 (PMC3986684; doi:10.1016/j.stemcr.2014.01.018), 2014-03-20
Supplement: mmc1.pdf [file mmc1.pdf]

## **Stem Cell Reports, Volume 2**

### **Supplemental Information**

#### **Progenitor Cell Dynamics in the Newt Telencephalon during Homeostasis and Neuronal Regeneration**

Matthew Kirkham, L. Shahul Hameed, Daniel A. Berg, Heng Wang, and András Simon

#### **Supplemental Information Inventory**

Supplementary Fig. 1 (related to Fig. 1):

Neurospheres can be generated from all parts of the brain

Supplementary Fig. 2 (related to Fig. 2):

Characterization of GS<sup>+</sup> ependomyglia cells and Notch signaling in the newt brain

Supplementary Fig. 3 (related to Fig. 3):

BrdU chased for 90 days labels type-1 cells and AraC treatment kills type-2 cells

Supplementary Fig. 4 (related to Fig. 4):

ChAT-expressing neurons in the parenchyma of the ventral telencephalon

## SFig. 1

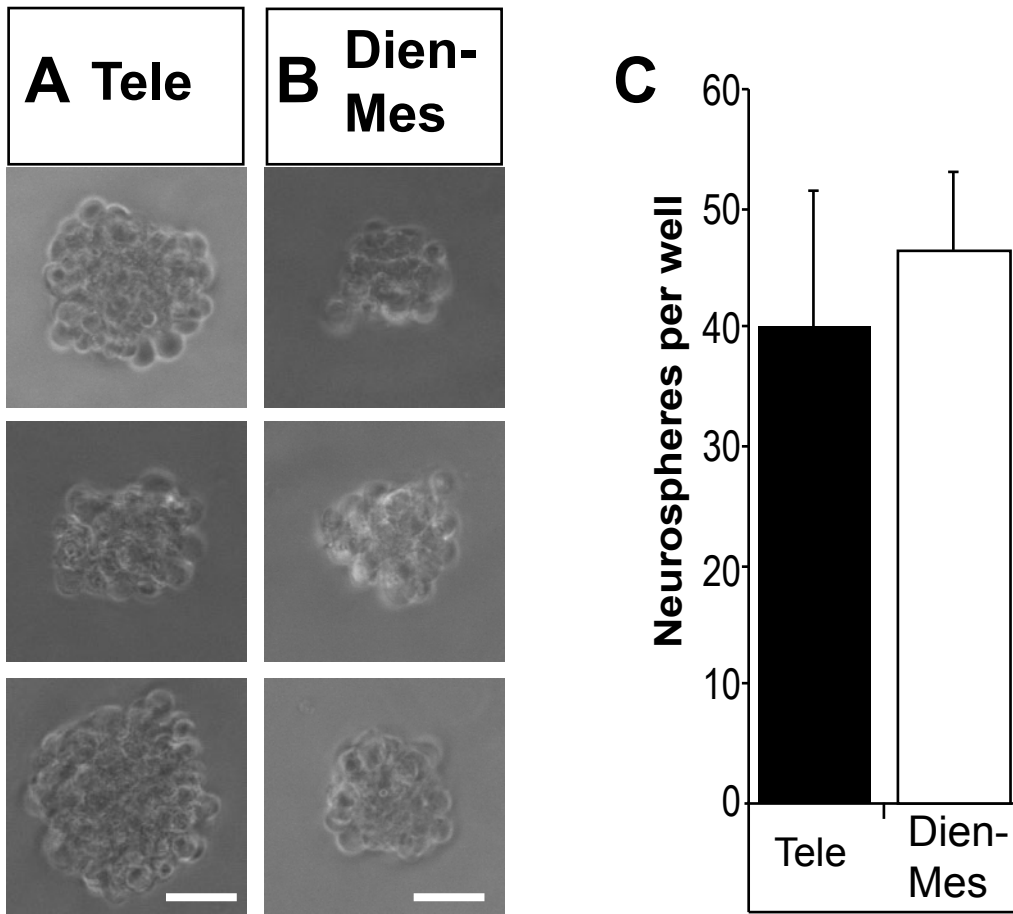

**Supplementary Fig: 1 Neurospheres can be generated from all parts of the brain (related to Fig. 1)**

(A) Example of spheres generated from the telencephalon (Tele).

(B) Example of spheres generated from the dien- and mesencephalon (Dien-Mes).

(C) Quantification of sphere-formation. Data represented as mean ± SEM.

P<0.05 n=4.

SFig. 2

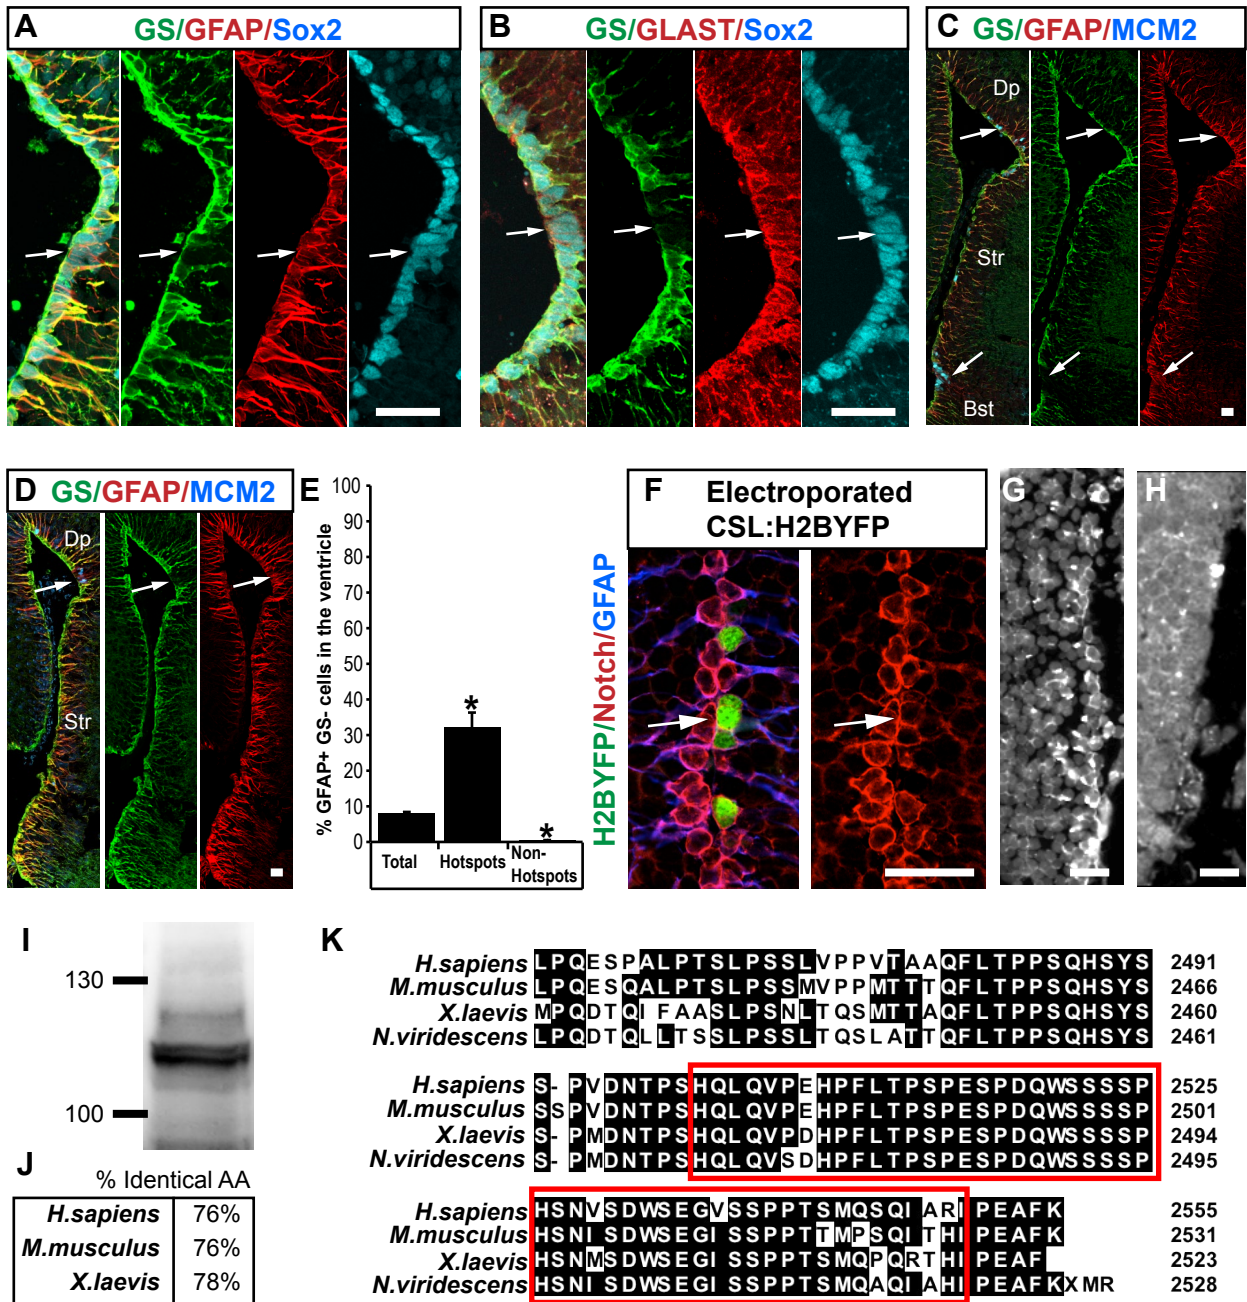

**Supplementary Fig. 2: Characterization of GS+ ependymoglia cells and Notch signaling in the newt brain (related to Fig. 2)**

- (A) Sox2 labels all type-2 ependymoglia (GS-/GFAP+). Arrow points to GS-cells.
- (B) GLAST labels all type-2 ependymoglia (GS-/Sox2+). Arrow points to GS-cells.
- (C-D) Over views of the ventricular wall showing that the vast majority of the ependymoglia cells are non-proliferating type-1 (GFAP+/GS+). Apart from the proliferating hotspot regions (arrows) such as the dorsal pallium (Dp), and the bed nucleus of the stria terminalis (Bst) there are no clusters of type 2 cells present in the ventricular wall. Striatum: (Str).
- (E) Quantification of type-2 ependymoglia cells (GFAP+/GS-) in the ventricle wall of the telencephalon. Note that type-2 ependymoglia cells are essential absent in non-hotspots. Data represented as mean  $\pm$  SEM.  $P < 0.05$   $n = 4$ .
- (F) Type-1 (GFAP+/Notch1+) ependymoglia cells in the lateral wall of the lateral ventricle (non-hotspot) are capable of driving H2BYFP expression from a mammalian 12xCSL promoter (arrow).
- (G-H) In situ hybridization of anti-sense probe against Notch1 labeled ependymoglia cells in non-hotspot region (G), compared to the sense probe against Notch1 (H).
- (I) Whole brain lysate contains the cleaved form of the Notch1, detected by Western blot.
- (J) *N. viridescens* Notch1 is highly conserved compared to other species.
- (K) Alignment of *N. viridescens* Notch1 terminal sequence to other mammalian and amphibian species. Amino acids highlighted in black are identical across all species analyzed. Anti-Notch1 antibody was raised to a sequence that mapped to a region with in amino acids 2500 to 2550 (red box) of the *H. sapiens* Notch1.
- Scale bars 50 $\mu$ m

### SFig. 3

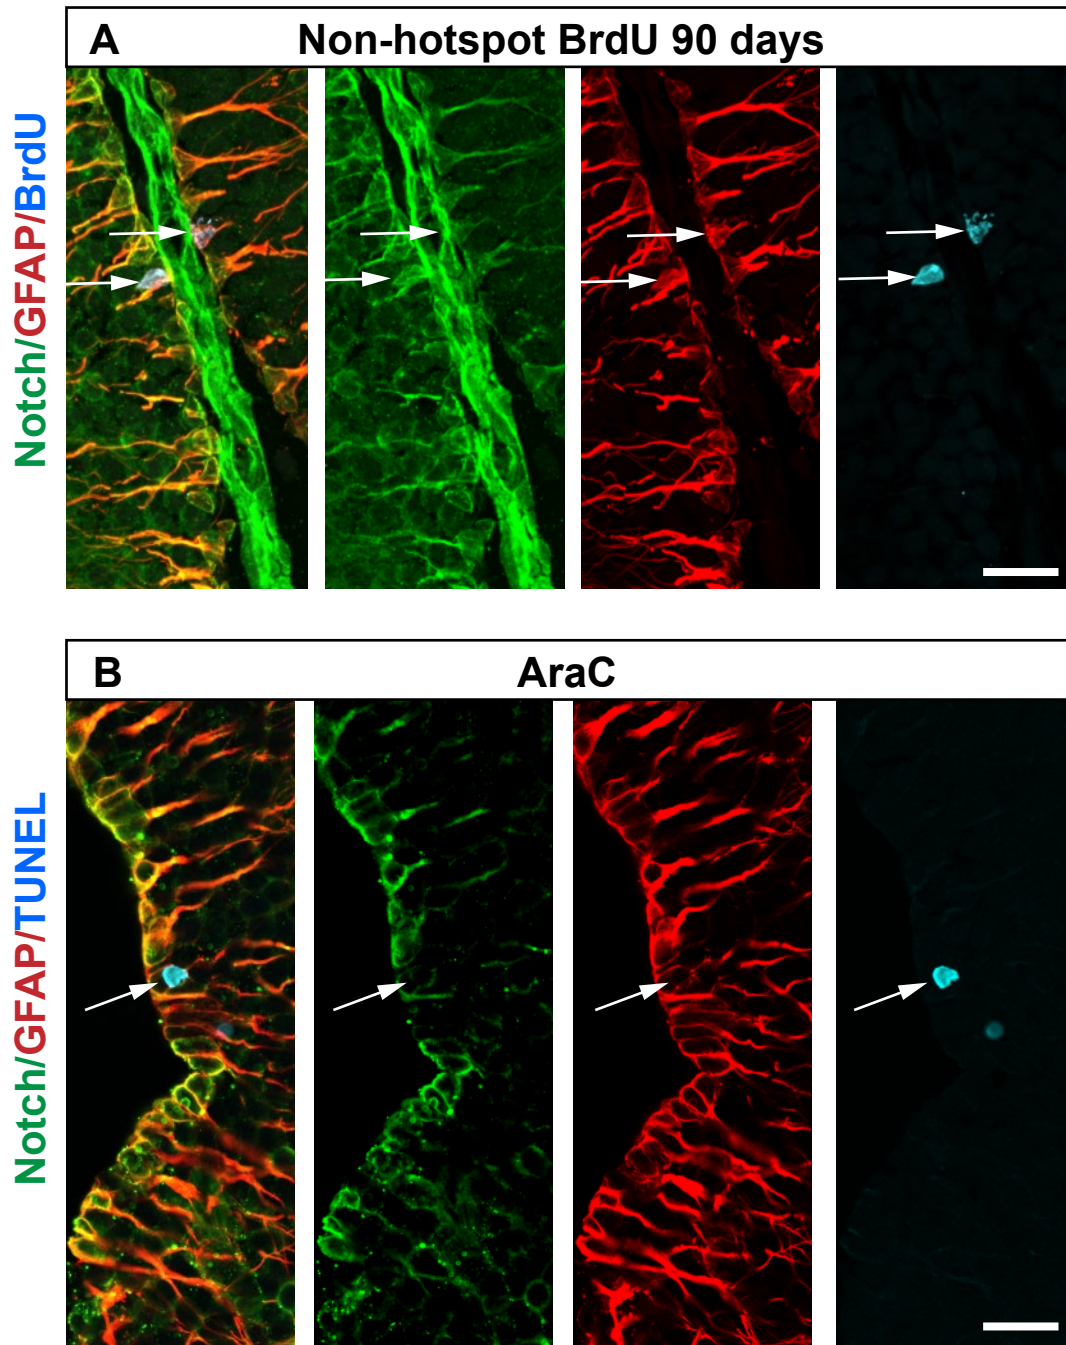

**Supplementary Fig. 3: BrdU chased for 90 days labels type-1 cells and AraC treatment kills type-2 cells (related to Fig. 3).**

(A) A pulse of BrdU was chased for 90 days. Arrows point to non-hotspot type-1 ependymoglia cells retaining BrdU.

(B) AraC treatment kills type-2 cells. Arrows point to TUNEL staining in hotspots.

Scale bars 50 $\mu$ m



## SFig. 4

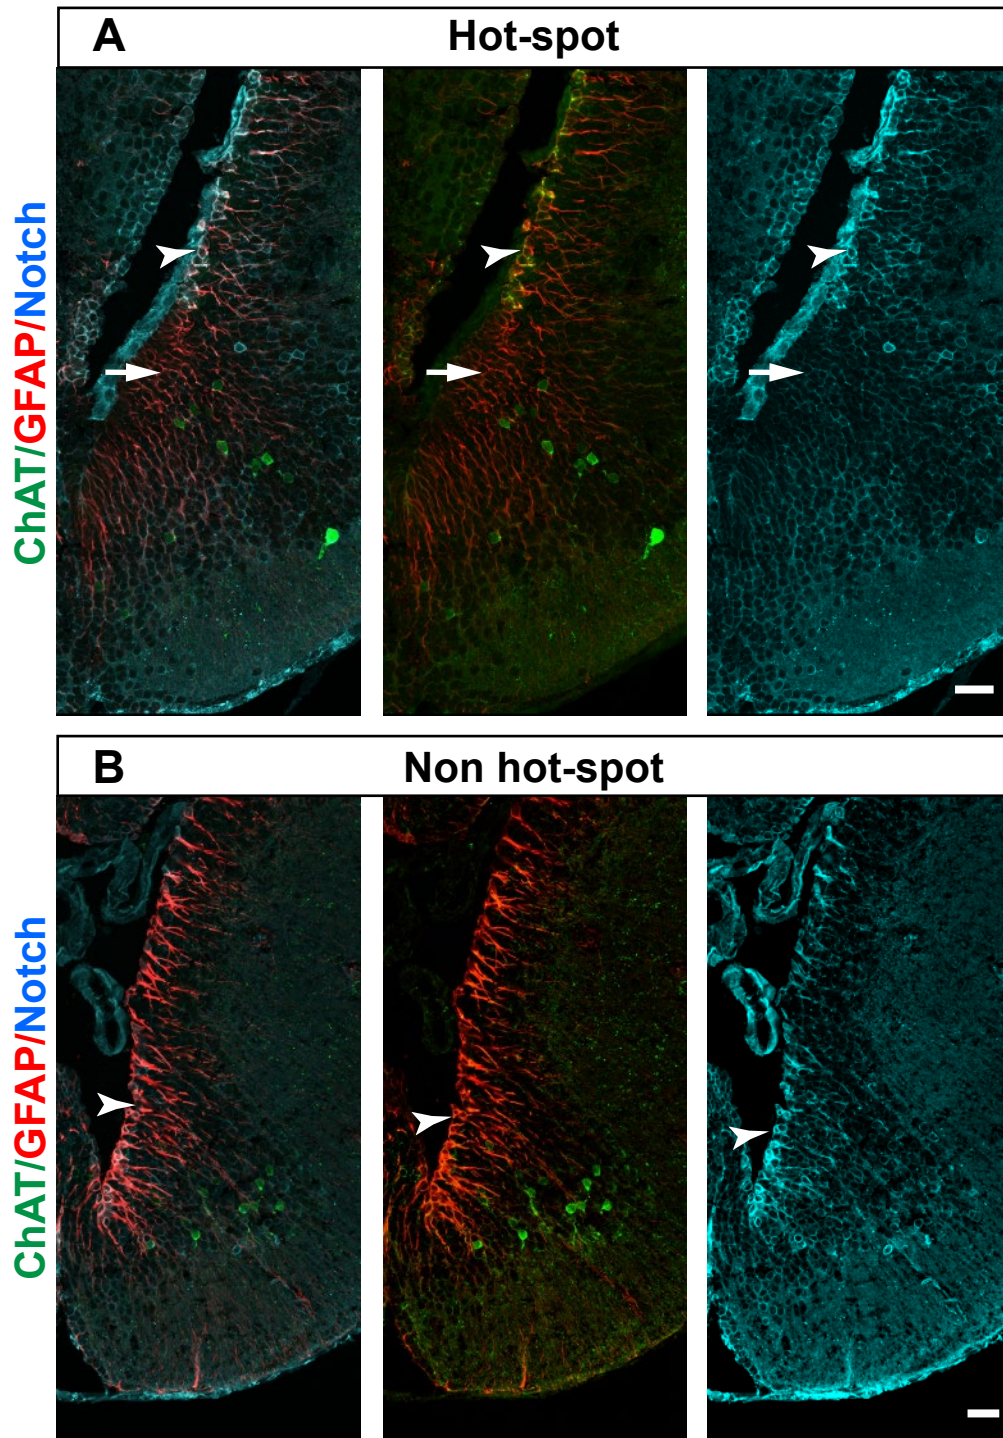

**Supplementary Fig. 4: ChAT-expressing neurons in the parenchyma of the ventral telencephalon (related to Fig. 4)**

(A-B) ChAT<sup>+</sup> neurons are present in the parenchyma of the bed nucleus of the stria terminalis adjacent to the ventral hotspot (A). The ventral hotspot is identified by the presence of type-2 ependymoglia cells (arrow). Arrowheads point to type-1 ependymoglia outside of the ventral hotspot. The ChAT<sup>+</sup> cells form a continuum starting caudally from the bed nucleus of the stria terminalis to the preoptic recess. (B) Ependymoglia cells of the ventral non-hotspots are type-1 cells (arrowheads).

Scale bars 50 $\mu$ m.
